# Supplementary material
Source: MDPI journal article supplement (https://www.mdpi.com/1999-4907/8/5/170)
Supplement: s1 [file s1]

**Table S1.** OLS and SQRT models, fit using all observations.

| **Site** | **Model** | **Intercept** | **Parameter Estimates and Predictor Variables *** | | | | |
| --- | --- | --- | --- | --- | --- | --- | --- |
| S1 | LOG | 4.69 | 0.54 d1.f | −0.68 hmax.l | 1.26 hmean.l |  |  |
|  | SQRT | 7.31 | −0.15 hmax.l | 0.53 hmean.l | 8.67 d1.l |  |  |
| S2 | LOG | 1.39 | 1.41 h80.f | 1.06 d1.f |  |  |  |
|  | SQRT | −3.36 | 0.54 h90.f | 8.65 d2.f |  |  |  |
| S3 | LOG | 2.82 | 0.95 h30.f | 1.49 d5.f |  |  |  |
|  | SQRT | −7.03 | 16.32 d5.f | 0.36 h70.l |  |  |  |
| S4 | LOG | 1.88 | 0.45 d3.f | 1.28 h90.l | 1.29 d1.l |  |  |
|  | SQRT | −0.28 | 6.68 d2.f | 0.33 hmax.l | 4.29 d5.l |  |  |
| S5 | LOG | 2.53 | 0.98 h40.f | 0.81 d2.f |  |  |  |
|  | SQRT | −0.03 | 0.15 hmax.f | 5.69 d2.f | 0.52 h10.l | −0.46 h30.l | 0.37 h60.l |

* h10, h30, h60, h70, h80, and h90 are the heights of the 10th, 30th, 60th, 70th, 80th, and 90th height percentiles of the canopy laser echoes. d1, d2, d3, and d5 are the proportions of echoes in interval 1, 2, 3, and 5 to the total number of echoes. hmean and hmax are the mean, and maximum for the heights of the echoes. The .f and .l subscript ending indicates first or last return dataset.
